# Supplementary material for: Changes of the gut microbiota composition and short chain fatty acid in patients with atrial fibrillation
Source: PeerJ. 2023 Dec 7;11:e16228. doi: 10.7717/peerj.16228 (PMC10710774; doi:10.7717/peerj.16228)
Supplement: Supplemental Information 1 [file peerj-11-16228-s001.xlsx]

## Sheet: Sheet1
sample	group	gender	age	smoking	alcohol	coronary heart disease	hypertension	diabetes mellitus	body mass index	LDLC	BNP	eGFR	ALT	AST	CRP	acetie acid	propionic acid	isobutyric acid	butyric acid	isovaleric acid	valeric acid	caproic acid
SR1	1	0	64	0	0	0	0	0	26.271	2.57	10	86.6	13	19	1.06	1691.22	947.192	56.734	711.991	54.001	101.472	29.273
SR2	1	1	76	1	1	1	1	0	21.953	1.37	37	72.2	15	21	3.64	822.287	483.984	75.219	558.941	76.632	20.744	1.749
SR3	1	0	57	0	0	0	0	0	22.893	2.66	10	99.7	66	57	3.14	2198.62	899.326	63.759	1111.8	43.818	100.781	2.743
SR4	1	0	57	0	0	0	0	0	24.447	1.84	10	90.9	27	15	0.42	1205.9	501.957	71.19	389.802	64.547	92.939	2.877
SR5	1	0	81	0	0	0	1	0	20	2.58	35	74	17	30	0.98	1184.02	503.208	46.345	224.354	43.356	2.549	0.714
SR6	1	0	69	0	0	0	0	0	25.39	2.69	16	95.1	22	28	0.54	495.323	271.71	59.236	180.746	52.43	68.858	36.148
SR7	1	1	78	1	0	0	0	0	25.766	0.9	11	63.4	25	27	0.8	1429.43	914.489	67.994	691.588	58.777	197.983	131.635
SR8	1	1	63	0	0	0	0	1	30.471	1.56	10	101	47	36	0.7	1167.64	904.937	91.794	294.268	62.456	9.486	0.65
SR9	1	1	63	1	1	1	1	1	24.974	1.7	189	30.8	33	20	30.7	1100.17	367.544	43.012	297.803	31.333	18.807	14.376
SR10	1	1	60	1	1	1	0	0	23.529	3.67	52	99.4	34	31	0.68	1016.98	749.264	108.107	601.059	133.551	156.709	4.224
SR11	1	0	70	0	0	0	0	0	22.148	4.32	47	86.2	12	19	0.65	1380.03	578.17	28.222	701.18	20.103	9.162	0.835
SR12	1	0	73	0	0	1	1	0	25.721	2.46	50	67.3	9	17	4.2	1786.16	1287.75	72.312	1144.47	64.851	205.932	10.806
SR13	1	1	64	1	1	1	0	1	23.457	3.22	22	92.1	19	23	1.82	839.256	393.124	115.53	118.057	132.905	12.376	0.761
SR14	1	0	73	0	0	0	1	0	17.778	2.43	35	76.9	14	25	3.14	997.118	569.348	87.418	429.603	85.064	127.612	5.781
SR15	1	0	37	0	0	0	1	0	22.806	2.61		102.7	25	23		664.795	291.67	65.888	230.411	63.19	84.769	14.052
SR16	1	0	76	0	0	0	1	1	26.667	1.74	56	85.3	10	16	0.39	1320.08	917.228	168.015	297.287	214.767	42.544	0.945
SR17	1	0	63	0	0	0	1	0	22.395	2	12	100.6	29	31	1.13	1672.15	626.604	34.036	1259.02	21.831	108.103	1.852
SR18	1	0	59	0	0	1	1	0	23.556	1.7	18	109.8	23	23	3.14	593.392	231.263	56.865	108.953	57.441	22.563	1.082
SR19	1	0	75	0	0	1	1	1	29.643	2.16	27	70.8	16	19	1.49	832.691	159.015	26.655	161.902	23.219	55.306	50.907
SR20	1	0	52	0	0	0	0	0	24.802	3.32	10	104.5	11	15	0.5	811.804	412.942	86.097	433.504	87.787	112.338	3.138
SR21	1	0	67	0	0	0	0	0	21.984	1.94	24	97.1	33	42	0.56	1134.11	690.809	71.282	378.209	59.814	101.999	1.737
SR22	1	0	64	0	0	0	0	0	26.444	2.36	19	92.3	19	25	0.67	1276.8	994.541	78.779	714.569	74.635	304.251	65.41
SR23	1	1	61	0	0	1	0	0	24.859	1.95	23	67.2	26	29	4.53	1292.2	1323.19	96.562	439.577	87.15	41.776	1.487
SR24	1	0	67	0	0	0	1	0	23.047	2.48	34	57.2	24	24	0.93	1450.62	1087.08	303.845	727.584	382.856	570.727	237.828
SR25	1	0	86	0	0	1	1	0	29.136	2.42	187	70.2	13	21	2.27	745.009	285.806	79.363	316.058	91.317	111.612	6.798
SR26	1	1	45	1	0	0	1	0	20.716	3.23	10	100.6	19	24	0.16	910.419	620.656	134	628.113	153.801	11.057	0.547
SR27	1	1	64	1	1	0	1	1	24	2.63	25	76.5	122	78	3.14	1246.51	663.624	58.823	507.371	51.208	110.734	2.123
SR28	1	0	56	0	0	1	1	0	25.817	1.83	10	96.9	19	23	2.52	1606.01	1141.76	75.094	544.293	60.538	203.25	2.105
SR29	1	0	67	0	0	0	1	0	25.682	1.76	10	93.5	17	24	1.05	1312.97	432.836	116.244	355.69	118.962	123.087	2.857
SR30	1	1	61	1	0	0	0	0	20.281	1.79	24	109.1	10	17	0.2	1391.55	666.888	38.597	605.935	34.555	11.743	1
AF1	2	0	64	0	0	0	0	1	27.055	2.78	421	96.7	21	20		1148.94	916.995	23.026	306.516	10.581	10.477	1.209
AF2	2	0	60	0	0	0	1	0	21.077	2.49	85	99.4	10	22		1500.47	632.634	31.278	828.216	18.76	74.422	4.798
AF3	2	1	60	0	1	0	0	0	20.904	1.81	51	106.2	25	24		1922.41	694.265	32.556	749.196	21.805	78.459	1.25
AF4	2	0	68	0	0	1	1	1	23.508	3.19	374	85.7	98	38		361.49	116.555	60.438	38.874	81.754	53.608	10.296
AF5	2	0	68	0	0	0	1	0	24.167	3.12	135	64.5	12	21	0.22	928.797	434.273	121.959	480.937	137.411	145.614	7.27
AF6	2	0	68	0	0	1	1	0	23.03	2.49	321	74.4	16	24	0.33	1066.13	2206.32	72.876	456.427	81.579	132.383	25.72
AF7	2	1	54	1	0	0	0	0	24.447	1.49	73	130.4	23	21	0.23	918.339	556.388	73.366	76.773	39.747	5.719	0.672
AF8	2	0	53	0	0	0	0	0	22.862	2.01	150	79.9	21	24	0.62	635.235	379.704	58.591	228.3	57.224	58.357	1.107
AF9	2	0	81	0	0	0	1	1	24.395	1.26	140	71.5	7	14	0.82	188.115	95.659	25.801	45.295	27.193	9.968	1.7
AF10	2	0	65	0	0	1	1	0	23.047	2.2	223	62.1	23	37	1.75	879.346	328.434	57.559	339.711	57.851	114.548	109.151
AF11	2	1	77	1	0	0	1	1	20.716	1.52	316	34.2	105	59	14.5	557.489	228.985	79.224	261.507	93.507	115.153	6.369
AF12	2	1	63	1	0	1	1	0	28.283	2.34	335	61.2	17	20	0.72	1210.96	1351.6	47.499	427.678	34.089	117.302	1.083
AF13	2	1	65	0	0	1	1	1	23.588	2.34	97	102.5	18	16	18.3	666.25	612.421	92.322	810.772	112.232	347.16	91.602
AF14	2	1	79	0	0	1	1	0	23.508	1.14	547	75.8	53	55	0.45	1029.88	713.302	66.348	83.121	59.472	107.272	19.744
AF15	2	1	49	1	1	0	0	0	22.491	2.13	163	118.7	24	21	1.64	952.033	364.425	22.773	97.925	11.253	8.142	1.383
AF16	2	0	83	0	0	0	0	0	21.778	2.89	258	84.6	12	23		299.188	53.604	28.964	41.864	29.702	28.572	1.43
AF17	2	1	72	1	1	0	0	0	22.72	2.01	205	87.1	17	23	0.53	873.004	998.367	123.15	609.646	147.923	161.06	7.91
AF18	2	1	74	1	1	0	0	0	25.309	3.24	108	57.3	17	22	0.99	1472.92	1318.19	26.32	1004.35	19.088	85.689	1.418
AF19	2	1	67	1	1	0	1	1	28.197	2.6	40	82.5	31	20	5.86	1675.12	649.224	26.798	1288.89	25.118	130.171	36.205
AF20	2	1	67	1	0	0	0	0	24.327	1.67	164	65.2	16	23	6	1299.69	1022.45	10.64	239.221	8.229	36.148	0.827
AF22	2	0	71	0	0	0	0	0	28	3.74	139	74.1	16	24	2.09	1589.09	1526.11	28.857	769.618	28.52	91.142	2.27
AF23	2	0	81	0	0	1	0	0	24.56	2.34	289	63.6	19	26	1.58	923.95	400.399	98.344	68.071	89.27	12.725	1.053
AF21	2	0	84	0	0	1	1	0	20.061	2.34	129	52.9	12	21	0.44	477.99	215.512	53.521	87.995	54.229	4.365	0.593
AF24	2	1	80	1	1	1	1	1	28.72	1.9	527	82.3	31	31	3.14	974.316	637.296	11.226	819.224	13.649	343.956	68.71
AF25	2	1	61	1	0	1	0	1	24.27	1.88	114	109.4	53	39	5	1933.79	966.251	146.923	760.675	151.399	241.723	14.505
AF26	2	1	61	1	1	0	1	0	20.904	2.52	464	34.5	24	25	0.81	769.279	596.173	28.666	468.827	14.842	19.034	1.725
AF27	2	1	82	0	0	0	0	1	25.594	1.73	102	75.3	33	30	5	819.478	948.669	43.656	86.913	33.691	31.217	5.182
AF28	2	1	67	1	1	0	1	0	25.156	1.94	650	55.3	21	26	0.34	976.961	610.179	6.471	120.994	12.35	4.245	0.817
AF29	2	0	66	0	0	0	1	0	25	1.87	61	97.8	30	36	0.74	1369.71	732.174	9.459	561.857	5.06	12.523	0.501
AF30	2	1	56	1	1	0	1	0	25.26	0.77	114	128.6	25	22	0.34	2067.18	1013.44	103.77	1167.11	92.743	198.209	6.222
