# Supplementary material for: Changes of the gut microbiota composition and short chain fatty acid in patients with atrial fibrillation
Source: PeerJ journal article supplement (doi:10.7717/peerj.16228), 2023-12-07

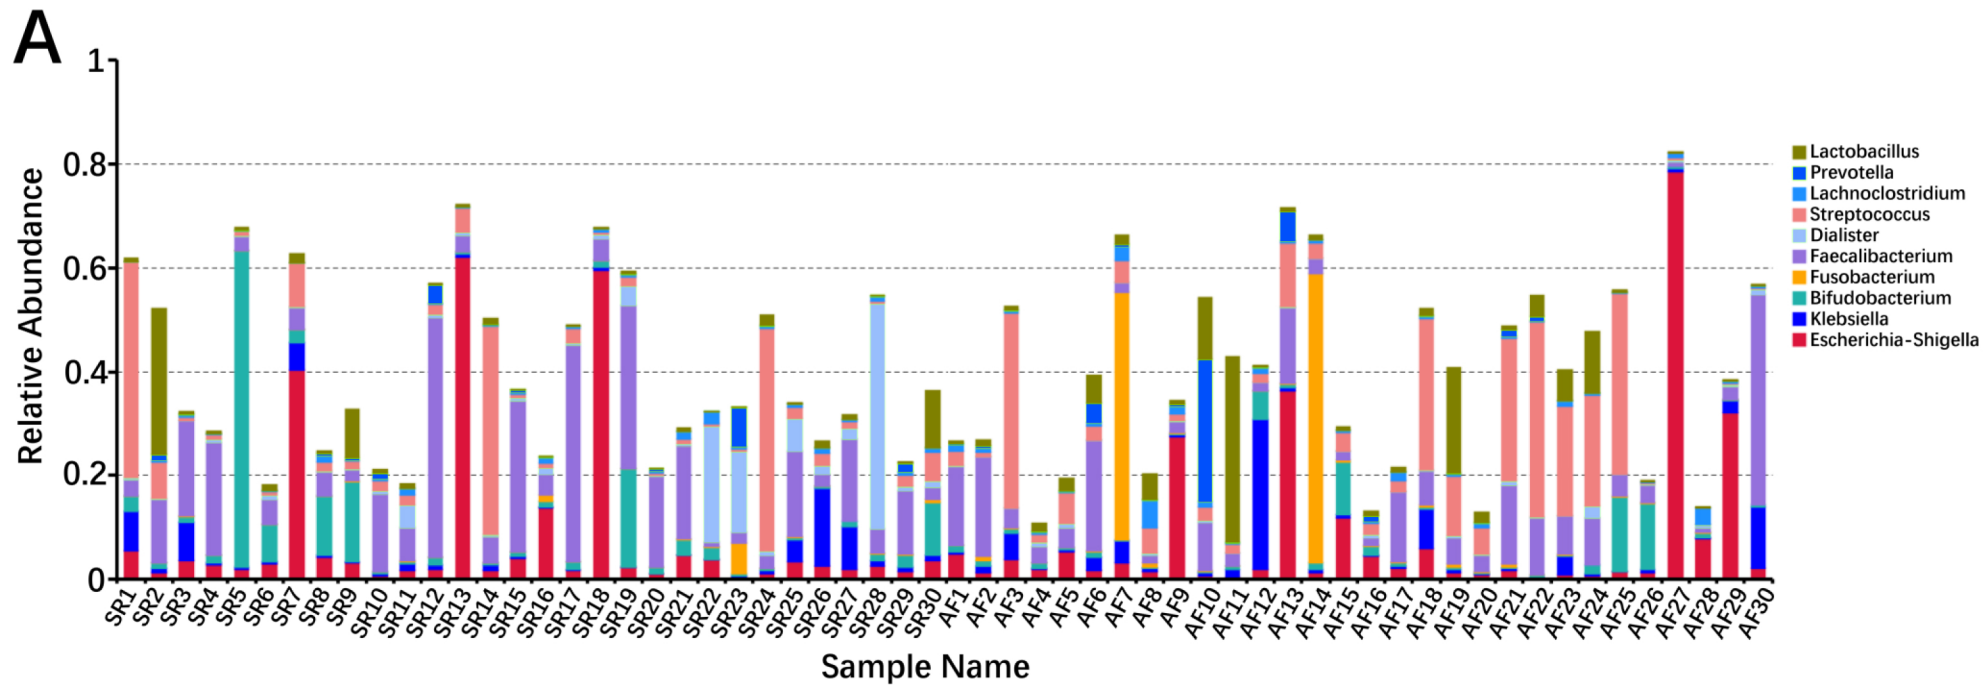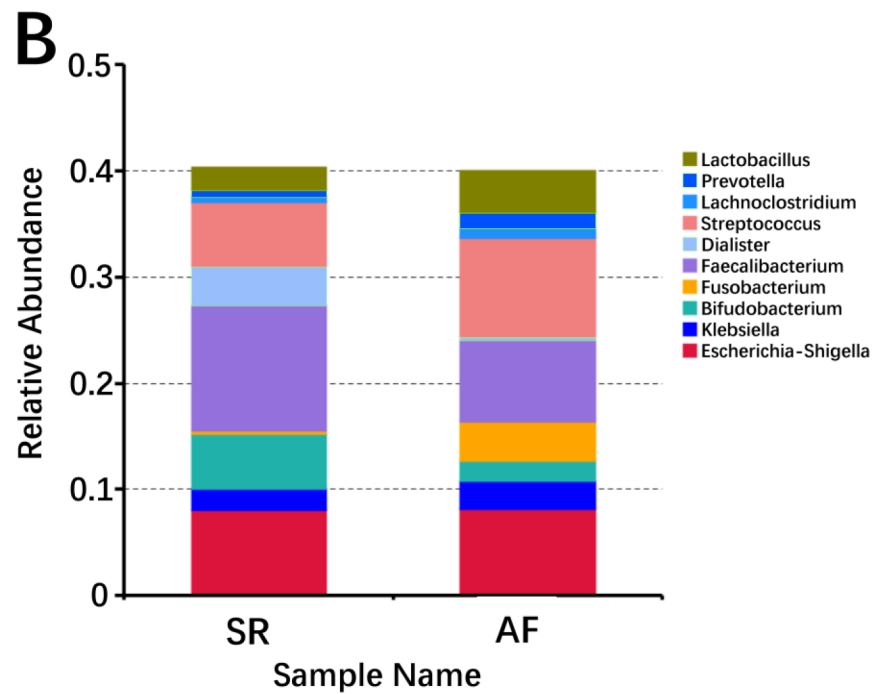

Supplement: Supplementary_Figure_2.pdf [file Supplementary_Figure_2.pdf]
